1                    **SUMOylation of Na<sub>v</sub>1.2 channels regulates the velocity of**  
2                    **backpropagating action potentials in cortical pyramidal neurons**

3

4                    **Authors: Oron Kotler,<sup>1</sup> Yana Khrapunsky,<sup>1</sup> Arik Shvartsman<sup>1</sup>, Hui Dai,<sup>2</sup> Leigh D.**  
5                    **Plant,<sup>3</sup> Steven A.N. Goldstein,<sup>2\*</sup> and Ilya Fleidervish<sup>1\*</sup>**

6                    \* Co-corresponding authors

7

8                    <sup>1</sup> Department of Physiology and Cell Biology, Faculty of Health Sciences, Ben-  
9                    Gurion University of the Negev, Beer Sheva 84105, Israel

10                    <sup>2</sup> Departments of Pediatrics and Physiology & Biophysics, University of California,  
11                    Irvine, 1001 Health Sciences Road, Irvine Hall, Irvine, CA 92697, USA

12                    <sup>3</sup> Department of Pharmaceutical Sciences, Northeastern University, 360 Huntington  
13                    Avenue, Boston, MA 02115, USA

14

15                    **Corresponding Authors:** Ilya Fleidervish & Steven A.N. Goldstein

16

17                    **Emails:** [ilya@bgu.ac.il](mailto:ilya@bgu.ac.il) (I.F.), [sgoldst2@hs.uci.edu](mailto:sgoldst2@hs.uci.edu) (S.G.)

18

19                    **Keywords:** axon initial segment, layer 5 pyramidal neurons, Na<sub>v</sub>1.2, SUMO, SENP,  
20                    action potential, backpropagation, I<sub>NaP</sub>, neuronal excitability

21

22                    **This file includes:**

23                    Main Text

24                    Figure 1 with Figure supplement 1

25                    Figure 2

26                    Figure 3 with Figure supplements 1&2

27                    Figure 4

28                    Figure 5

29                    Figure 6 with Figure supplement 1

30                    Supplementary Figure S1

31

## 32 **Abstract**

33 Voltage-gated sodium channels located in axon initial segments (AIS) trigger action  
34 potentials (AP) and play pivotal roles in the excitability of cortical pyramidal neurons.  
35 The differential electrophysiological properties and distributions of Na<sub>v</sub>1.2 and Na<sub>v</sub>1.6  
36 channels lead to distinct contributions to AP initiation and backpropagation. While  
37 Na<sub>v</sub>1.6 at the distal AIS promotes AP initiation and forward propagation, Na<sub>v</sub>1.2 at the  
38 proximal AIS promotes backpropagation of APs to the soma. Here, we show the Small  
39 Ubiquitin-like Modifier (SUMO) pathway modulates persistent sodium current (I<sub>NaP</sub>)  
40 generation at the AIS to increase neuronal gain and the speed of backpropagation. Since  
41 SUMO does not affect Na<sub>v</sub>1.6, these effects were attributed to SUMOylation of Na<sub>v</sub>1.2.  
42 Moreover, SUMO effects were absent in a mouse engineered to express Na<sub>v</sub>1.2-  
43 Lys38Gln channels that lack the site for SUMO linkage. Thus, SUMOylation of Na<sub>v</sub>1.2  
44 exclusively controls I<sub>NaP</sub> generation and AP backpropagation, thereby playing a  
45 prominent role in synaptic integration and plasticity.

## 46 **Significance Statement**

47 Resolving a long-standing controversy, SUMOylation of Na<sub>v</sub>1.2 channels is revealed to  
48 regulate the excitability of cortical neurons by augmenting persistent sodium current at  
49 critical subthreshold voltages. SUMOylation increases the speed of action potential  
50 backpropagation from the axon initial segment to the soma, a phenomenon critical to  
51 long-term potentiation, spike-time dependent plasticity, and release of retrograde factors  
52 essential to synaptic plasticity and development.

53

54 **Main Text**

55 **Introduction**

56 In cortical pyramidal cells, as in many CNS neurons, action potentials (APs)  
57 initiate in the axon initial segment (AIS), the proximal part of the axon where the  
58 neuronal membrane is not covered with a myelin sheath. The AIS is characterized by  
59 specialized assembly of scaffolding proteins and voltage-gated channels with distinctive  
60 biophysical properties (Bean, 2007; Rasband, 2010). Classically, APs propagate forward  
61 from the AIS into the axonal arbor where they trigger neurotransmitter release from  
62 presynaptic terminals. APs can also propagate backward into the dendrites of cortical  
63 pyramidal cells where they are proposed to play a role in synaptic plasticity by regulating  
64 synaptic strength and the coordination of synaptic inputs (Stuart and Sakmann, 1994;  
65 Markram et al., 1997). Both the initiation and propagation of APs are critically  
66 dependent on the distribution and properties of voltage-gated Na<sup>+</sup> (Na<sub>V</sub>) channels in  
67 specific neuronal compartments (Stuart et al., 1997; Hu et al., 2009; Baranauskas et al.,  
68 2013). Therefore, identifying signaling pathways that regulate the biophysical properties  
69 of neuronal Na<sub>V</sub> channels is key to understanding spike generation, propagation and  
70 integration in cortical circuits (Cantrell et al., 1996; Cantrell and Catterall, 2001; Bender  
71 et al., 2012; Kole and Stuart, 2012; Yin et al., 2017).

72 Central neurons express, to varying degrees, three primary Na<sub>V</sub> channels α-  
73 subunit isoforms. Na<sub>V</sub>1.1, Na<sub>V</sub>1.2, and Na<sub>V</sub>1.6 are found in mature neurons while Na<sub>V</sub>1.3  
74 channels also found in the developing nervous system (Goldin et al., 2000). Each Na<sub>V</sub>  
75 isoform has a distinct spatiotemporal distribution and is subject to the activity of specific  
76 signaling pathways that regulate the biophysical properties and trafficking behavior of the

77 channel. For example, in mature pyramidal neurons, the AP trigger zone, which is  
78 located in the distal AIS, contains almost exclusively Nav1.6 channels (Lorincz and  
79 Nusser, 2008; Hu et al., 2009; Lorincz and Nusser, 2010; Tian et al., 2014). These  
80 channels are also present in the nodes of Ranvier (Caldwell et al., 2000). In contrast, the  
81 proximal portion of the AIS, soma and dendrites are believed to contain mostly Nav1.2  
82 channels (Hu et al., 2009; Grubb et al., 2011). While this difference in distribution has  
83 long made it tempting to posit that the initiation and forward propagation of APs are  
84 predominately dependent on Nav1.6 channels and the backpropagation of APs is  
85 dependent on the activity of Nav1.2 channels, studies of the biophysical attributes of the  
86 two channels have not previously verified this hypothesis.

87 While heterologous studies show that Nav1.6 channels activate at more negative  
88 voltages than other neuronal Nav isoforms and have a higher propensity to generate non-  
89 inactivating currents, differences in the gating behavior of Nav1.2 and Nav1.6 channels  
90 appear to be subtle within their native neuronal milieu (Smith et al., 1998; Zhou and  
91 Goldin, 2004; Rush et al., 2005; Chen et al., 2008). Indeed, using knockout mice, we  
92 found that Nav1.6 channels were not required to determine the initiation site for APs  
93 within the AIS, for backpropagation into the dendrites, or for the lower activation  
94 threshold voltage for APs that is commonly observed in pyramidal neurons (Katz et al.,  
95 2018).

96 Although the biophysical differences between native Nav1.2 and Nav1.6 are  
97 subtle, each channel isoform is differentially regulated by neuromodulators. Thus,  
98 Nav1.6 channels are less sensitive to inhibition by cAMP-dependent protein kinase or  
99 protein kinase C mediated phosphorylation (Chen et al., 2008). This finding explains

100 divergent regulation of Nav channel subtypes following the activation of D1/D5  
101 dopamine or 5-HT<sub>1A</sub> serotonergic receptors (Maurice et al., 2001; Yin et al., 2017). We  
102 have shown that ion channels are also subject to post-translational regulation by covalent  
103 linkage of Small Ubiquitin-like Modifier (SUMO) proteins (Rajan et al., 2005; Plant et al.,  
104 2010; Plant et al., 2011; Plant et al., 2012; Plant et al., 2016; Xiong et al., 2017; Plant et  
105 al., 2020). Three SUMO isoforms (SUMO1-3) are operative in central neurons and can  
106 modulate the gating of specific channels following their conjugation to the ε-amino group  
107 of specific lysine residues on the intracellular termini or cytoplasmic loops of the channel  
108 subunits. Further, we found the enzymes required to activate, mature and conjugate  
109 SUMO reside in the plasma membrane of *Xenopus* oocytes, tissue culture cells and  
110 neurons (Rajan et al., 2005; Plant et al., 2010; Plant et al., 2011; Plant et al., 2016).  
111 Although SUMOylation is a covalent post-translational modification it is a dynamic  
112 process subject to rapid reversal by the action of the SENP family of sentrin-specific  
113 cysteine proteases. Thus far, we have observed that SUMOylation increases excitability  
114 either by decreasing potassium flux through K<sub>V</sub> and K<sub>2P</sub> channels or by increasing the  
115 activity of Nav channels and that the opposite functional effects are mediated by the  
116 activity of SENPs. Further, we have shown that SUMO has differential effects on the  
117 principal Nav channel isoforms expressed in central neurons. Specifically, we found that  
118 SUMOylation modulates the voltage-dependent gating of Nav1.2 channels via linking to  
119 Lysine 38, but SUMO does not interact with Nav1.6 (Plant et al., 2016).

120 Here, we tested the hypothesis that SUMOylation regulates the excitability of  
121 cortical pyramidal neurons. By combining whole-cell recordings with high-speed  
122 fluorescence imaging to simultaneously monitor Na<sup>+</sup> flux in different subcellular

123 compartments of L5 cortical neurons we found that SUMO1 increases excitability via a  
124 synergistic effect on subthreshold  $K^+$  and  $Na^+$  conductances. Thus, SUMOylation  
125 suppresses the open probability of  $K^+$  channels, while concurrently increasing  $Na^+$  influx  
126 via a leftward shift in the steady-state activation of subthreshold persistent  $Na^+$  currents.  
127 These effects are absent in a CRISPR-generated mouse that constitutively expresses  
128  $Na_v1.2$ -Lys38Gln channels, a channel variant that cannot be SUMOylated. Confirming  
129 the long-held notion for their roles in the AIS based on distribution, and consistent with  
130 our previous report that SUMO regulates  $Na_v1.2$  but not  $Na_v1.6$  channels, we  
131 demonstrate that SUMOylation of  $Na_v1.2$  regulates the velocity of backpropagation in  
132 cortical pyramidal neurons independent of the speed at which AP propagate forward from  
133 the AIS.

134

## 135 **Results**

### 136 **SUMO1 increases the excitability of layer 5 cortical neurons**

137 Previously, we showed that the effects of SUMOylation and deSUMOylation of neuronal  
138 ion channels underlying  $I_{DR}$ ,  $I_{Kso}$ , and  $I_{Na}$  could be assessed by including purified SUMO1  
139 or SENP1 peptides, respectively, in the recording pipette solution (Plant et al., 2011;  
140 Plant et al., 2012; Plant et al., 2016). To characterize the effects of the SUMO pathway  
141 on the excitability of layer 5 cortical pyramidal neurons, we made whole-cell, current-  
142 clamp recordings from these cells using pipettes filled with a solution containing SUMO1  
143 or SENP1 peptides at 1000 and 250 pmol/L, respectively. We have previously shown  
144 that peptides at these concentrations produce maximal effects on  $K_V$ ,  $K_{2P}$ , and  $Na_v$

145 channels in cultured rat hippocampal neurons, cerebellar granule neurons, human  
146 ventricular cardiomyocytes derived from iPS cells, and on channels expressed in  
147 heterologous cell systems (Plant et al., 2010; Plant et al., 2011; Plant et al., 2012; Plant et  
148 al., 2016; Plant et al., 2020).

149       Passive neuronal properties and repetitive firing characteristics were assessed by  
150 examining the voltage responses to a series of prolonged hyperpolarizing and  
151 depolarizing current pulses delivered via the somatic pipette. Because cortical cells are  
152 geometrically complex, we compared data obtained two minutes and 35 minutes after  
153 break-through into whole-cell configuration to account for slow intracellular dialysis of  
154 the peptide into the neurons. As SUMO1 diffused into the cell, the frequency of spike  
155 firing in response to a given depolarizing suprathreshold current pulse increased (**Figure**  
156 **1a**). Thus, the mean instantaneous firing frequency in response to a 0.3 nA current  
157 injection increased from  $14.7 \pm 3.9$  Hz immediately after the break-in to  $25.7 \pm 5.4$  Hz ( $n=6$ ,  
158  $p=0.029$ ) after 35 mins of SUMO1 dialysis. In contrast, dialysis with the SENP1-  
159 containing solution caused a gradual decrease in the frequency of repetitive firing over  
160 time. The mean instantaneous firing frequency in response to a 0.3 nA current pulse  
161 decreased from  $15.6 \pm 2.3$  Hz immediately after the break-in to  $5.3 \pm 1.8$  Hz ( $n=5$ ,  $p=0.004$ )  
162 after 35 mins of SENP1 dialysis.

163       Examining the voltage responses to small hyperpolarizing current pulses before  
164 and following the SUMO1 and SENP1 dialysis revealed that the peptides elicited  
165 opposite effects on passive neuronal properties (**Figure 1b**). Thus, the apparent input  
166 resistance ( $R_{in}$ ), calculated as a ratio of the steady-state amplitude of the voltage  
167 deflection to current amplitude, gradually increased when SUMO1 was included in the

168 pipette, from  $96.8 \pm 12.9 \text{ M}\Omega$  at a time of break-in to the cell to  $120.7 \pm 14.5 \text{ M}\Omega$  (n=6,  
169  $p < 0.03$ ) at 35 min of recording. In contrast, dialysis of the neurons with SENP1 caused  
170  $R_{in}$  to decrease as a function of recording time from  $119.4 \pm 13.6 \text{ M}\Omega$  to  $82.2 \pm 5.4 \text{ M}\Omega$   
171 (n=5,  $p < 0.02$ ). In parallel, the membrane time constant ( $\tau_m$ ) obtained by fitting a mono-  
172 exponential function to the voltage transient following the end of the hyperpolarizing  
173 current pulse, was increased by SUMO1 application from  $14.4 \pm 1.9 \text{ ms}$  at the time of  
174 break-in to  $19.1 \pm 3.2 \text{ ms}$  (n=6,  $p < 0.03$ ) and shortened by SENP1 application from  $19.5$   
175  $\pm 2.34 \text{ ms}$  to  $14.1 \pm 2.3 \text{ ms}$  (n=5,  $p < 0.02$ ). Recording of similar duration with control  
176 intracellular solution had no significant effect on  $R_{in}$  ( $112.8 \pm 19.1$  vs.  $113.1 \pm 18.2 \text{ M}\Omega$ ,  
177 n=5,  $p = 0.83$ ) and  $\tau_m$  ( $14.8 \pm 1.1$  vs.  $15.2 \pm 1.2 \text{ ms}$ , n=5,  $p = 0.13$ ). These findings indicate  
178 that in L5 cortical neurons the SUMO pathway regulates potassium channels that  
179 determine the passive membrane properties. Furthermore, the relatively high  
180 effectiveness of SENP1 suggests that in L5 neurons, as in other cell types (Rajan et al.,  
181 2005; Plant et al., 2011; Plant et al., 2012; Plant et al., 2016; Xiong et al., 2017 ), a  
182 significant fraction of these channels are SUMOylated under control conditions.

183         The effect of SUMO1 and SENP1 on repetitive firing may reflect the action of the  
184 peptides on passive neuronal characteristics or their influence on the ion currents  
185 underlying spike generation. Theoretical analysis revealed that while the former  
186 mechanism should elicit a parallel shift of the frequency–current (F-I) curve to the right  
187 or left along the current axis (Chance et al., 2002), the latter should alter the neuronal  
188 gain, i.e., the steepness of the slope of the F-I characteristic. Comparing the linear fits of  
189 the mean F-I curves obtained immediately after the break-in and following the SUMO1  
190 dialysis, we found that the curve steepness increased by ~75%, from 60 to 106 Hz/ nA (n



191 = 6) (**Figure 1 – Figure Supplement 1**). Dialysis with control pipette solution had little  
192 to no effect on the neuronal gain (63 vs. 78 Hz/nA, respectively, n=5). In contrast, in  
193 recordings with SENP1 containing pipette, the gain decreased from 98 to 33 Hz/ nA (n =  
194 5).

195 To test our hypothesis that SUMOylation of Nav1.2 channels can regulate the  
196 excitability of L5 cortical neurons, we used CRISPR/ Cas9 to engineer a mouse model  
197 carrying Nav1.2-Lys38Gln, a mutation that removes the only SUMO-conjugation site in  
198 Nav1.2 channels (Plant et al., 2016). The genotype of the mice was verified by PCR  
199 screening and sequencing analysis (**Supplementary Figure S1**). First, we sought to find  
200 out whether SUMO1 and SENP1 dialysis affect the F-I relationship of L5 neurons from  
201 the Nav1.2-Lys38Gln mutant mice (**Figure 2a**). As in WT neurons, SUMO1 dialysis  
202 enhanced the frequency of repetitive firing for a given amplitude of the current pulse,  
203 whereas the SENP1 dialysis had the opposite effect. Thus, the mean instantaneous firing  
204 frequency in response to a 0.3 nA current injection increased from  $18.3 \pm 2.0$  Hz  
205 immediately after the break-in to  $21.4 \pm 1.7$  Hz (n=10, p=0.017) after 35 mins of SUMO1  
206 dialysis. In contrast, the mean instantaneous firing frequency decreased from  $20.7 \pm 3.1$   
207 Hz immediately after the break-in to  $11.5 \pm 5.9$  Hz (n=7, p=0.035) after 35 mins of SENP1  
208 dialysis.

209 Both treatments, however, affected the position of the F-I curve relative to the  
210 current axis while little to no effect on its slope was observed (**Figure 2b**), consistent  
211 with the hypothesis that, in Nav1.2-Lys38Gln neurons, SUMOylation primarily affects  
212 passive neuronal properties. Indeed, in Nav1.2-Lys38Gln mutant neurons, SUMO1  
213 dialysis increased the apparent  $R_{in}$  (from  $131.9 \pm 17.9$  M $\Omega$  to  $161.3 \pm 20.1$  M $\Omega$ , n=7,

214  $p < 0.003$ ) whereas dialysis with SENP1 had an opposite effect (from  $170.5 \pm 13.2 \text{ M}\Omega$  to  
215  $92.7 \pm 12.4 \text{ M}\Omega$ ,  $n=6$ ,  $p < 0.005$ ) (**Figure 2c**).

216

### 217 **SUMO1 and SENP1 have the opposite effect on the voltage-dependence of $I_{\text{NaP}}$**

218 In cortical pyramidal neurons, the persistent sodium current operates at a  
219 subthreshold range of voltages and is one of the main factors influencing the frequency of  
220 repetitive firing, thereby modifying the neuronal gain (Stuart and Sakmann, 1995;  
221 Astman et al., 2006). We have recently shown that in pyramidal cells, most  $I_{\text{NaP}}$  is  
222 generated by somatodendritic  $\text{Na}^+$  channels (Fleidervish et al., 2010; Shvartsman et al.,  
223 2021). The immunohistochemical evidence indicates that soma, dendrites, and proximal  
224 AIS of L5 pyramidal neurons are populated predominately by the  $\text{Na}_v1.2$  channels whose  
225 activation and inactivation gating is sensitive to SUMOylation (Hu et al., 2009; Grubb et  
226 al., 2011; Plant et al., 2016). In contrast, the membrane of the distal AIS and the nodes of  
227 Ranvier contains  $\text{Na}_v1.6$  channels which lack SUMO binding domain (Plant et al., 2016).  
228 In order to find out how SUMO1 and SENP1 affect the persistent sodium current in  
229 different neuronal compartments, we combined whole-cell, voltage-clamp recordings  
230 from L5 neurons with high-speed fluorescence imaging of a  $\text{Na}^+$  sensitive dye, SBFI. A  
231 comparison of the voltage ramp elicited  $\text{Na}^+$  fluxes revealed that SUMO1 dialysis  
232 induces a left shift in the  $I_{\text{NaP}}$  activation kinetics in soma, proximal apical dendrite, and in  
233 the AIS of L5 neurons (**Figure 3a**). Thus, at a voltage of  $-50 \text{ mV}$ , the relatively small  
234 fluorescence change in the soma and apical dendrites was significantly increased by  
235 SUMO1 dialysis, whereas the amplitude of the  $\text{Na}^+$  signal in the AIS was less markedly  
236 increased (**Figure 3b**).

237 Measurements of half-activation voltage ( $V_{1/2}$ ) revealed that SUMO1 dialysis  
238 causes a significant leftward shift in the activation kinetics of both somatic channels and  
239 axonal channels in WT neurons (**Figure 3 – Figure Supplement 1**). However, the  
240 application of SUMO1 produced no effect on the voltage dependence of  $I_{NaP}$  in neurons  
241 from  $Na_v1.2$ -Lys38Gln mice (**Figure 3 – Figure Supplement 2**). Intracellular  
242 application of SENP1 resulted in an opposite effect on the voltage-dependence of  $I_{NaP}$ .  
243 Thus, a small but significant rightward shift in the  $V_{1/2}$  of  $I_{NaP}$  was observed in the soma  
244 and AIS of neurons from WT, but not  $Na_v1.2$ -Lys38Gln mice (**Figure 4**). These findings  
245 indicate that in cortical neurons a portion of the  $Na_v1.2$  channels is SUMOylated under  
246 control conditions.

#### 247 **SUMOylation of $Na^+$ channels affects voltage-dependent amplification of EPSPs in** 248 **pyramidal neurons**

249 Changes in the amplitude of  $I_{NaP}$  at subthreshold voltages are expected to  
250 influence the spatial and temporal summation of synaptic potentials (Deisz et al., 1991;  
251 Stuart and Sakmann, 1995; Stuart, 1999). Therefore, we studied the effect of  
252 SUMOylation on the amplitude and duration of EPSPs elicited in the pyramidal neuron  
253 by brief synaptic stimuli. The EPSPs were measured immediately after break-in to the  
254 whole-cell configuration and following 30 minutes of intracellular dialysis with SUMO1  
255 in WT and  $Na_v1.2$ -Lys38Gln neurons. SUMO1 did not change the duration of small  
256 EPSPs of less than 10 mV in amplitude (**Figure 5a**). In contrast, SUMO1 prolonged the  
257 decay time constant of EPSPs greater than 10 mV in amplitude in WT but not  $Na_v1.2$ -  
258 Lys38Gln neurons. In pooled EPSPs obtained from six neurons in each experimental  
259 group, SUMO1 dialysis enhanced the steepness of the slope of EPSP integral-to-peak

260 relationship (**Figure 5b**) in WT neurons, whereas SUMOylation had no effect on this  
261 relationship for Nav1.2-Lys38Gln cells.

262 **SUMOylation differentially affects the speed of forward- and back-propagating**  
263 **action potentials**

264 In cortical pyramidal neurons, the Nav1.2 channels are predominately localized in  
265 somatic, dendritic, and proximal AIS membrane where they are responsible for the  
266 propagation of action potentials back into the dendritic tree (Hu et al., 2009; Grubb et al.,  
267 2011). The Nav1.6 channel subtype is present in the distal AIS and in the nodes of  
268 Ranvier and it is responsible for forward propagation of action potentials into the axonal  
269 arbor (Hu et al., 2009). Because Nav1.2 and Nav1.6 channels respond differentially to  
270 SUMOylation, with the former being susceptible and the latter resistant to SUMO1, we  
271 hypothesized that this neuromodulation could differentially affect the speed of forward  
272 and backpropagation of the spikes. Seeking to test this hypothesis directly, we measured  
273 the velocity of forward and backpropagation using paired, whole-cell, loose patch  
274 recordings to detect the times of the spike arrival from multiple sites along the axo-  
275 somatic axis in sequence (**Figure 6**) (Baranauskas et al., 2013; Lezmy et al., 2017). In  
276 order to distinguish the axon from other thin processes emerging from the cell body, and  
277 to facilitate the distance measurements between the somatic and axonal pipettes, we filled  
278 the neurons for at least 15 minutes with the Na<sup>+</sup>-sensitive dye SBFI. Because of this and  
279 the relatively long time it takes to obtain action currents from multiple axonal locations,  
280 we were not able to measure the propagation velocity upon break-in to whole-cell  
281 configuration. Thus, we compared the propagation velocities in WT neurons dialyzed  
282 either with control or SUMO1 containing intracellular solution. As an additional control,

283 the same measurements were taken from the Nav1.2-Lys38Gln neurons dialyzed with  
284 SUMO1.

285 As demonstrated by a representative untreated WT cell (**Figure 6a**),  
286 backpropagation velocity (0.10 m/s) was significantly lower than the velocity of forward  
287 propagation (0.32 m/s). Dialysis with SUMO1, however, speeded the backpropagation,  
288 such that its velocity became almost equal to the speed of forward propagation, ~0.27 vs.  
289 0.23 m/s for forward and backpropagation, respectively (**Figure 6b**). This effect of  
290 SUMO1 was not observed in Nav1.2-Lys38Gln neurons, in which the backpropagation  
291 was still significantly slower than forward propagation, ~0.26 vs. 0.12 m/s for forward  
292 and backpropagation, respectively (**Figure 6c**). Comparison of the ratios of backward  
293 and forward propagation velocities revealed a significant increase in WT neurons  
294 dialyzed with SUMO1, as compared with untreated WT or SUMO1 treated Nav1.2-  
295 Lys38Gln cells (**Figure 6d**). To find out whether the leftward shift of Nav1.2 activation  
296 kinetics could increase the backpropagation velocity, we studied the dynamics of AP  
297 propagation in a simplified compartmental model in which we distributed the Nav1.2 and  
298 Nav1.6 channels in accordance with immunohistochemical data (Hu et al., 2009). In  
299 good agreement with our experimental results, a 6 mV leftward shift in half-activation  
300 voltage of Nav1.2 caused an about two-fold increase in AP backpropagation velocity  
301 (**Figure 6 – Figure Supplement 1**) whereas the forward propagation remained almost  
302 unaffected. Thus, our data indicates that in cortical pyramidal neurons SUMOylation of  
303 Nav1.2 channels could provide a “switch” allowing differential regulation of the AP  
304 invasion into the dendritic tree and synaptic plasticity whereas, the ongoing neuronal

305 activity that relies on SUMO-resistant, Nav1.6-mediated, spike forward propagation,  
306 would not be affected.

307

308

## 309 **Discussion**

310 We have shown before that SUMOylation has opposite but synergistic effects on  
311  $\text{Na}^+$  and  $\text{K}^+$  channel gating that conspire to increase the excitability and demonstrate that  
312 role of the regulatory pathway here in cortical pyramidal neurons. On the one hand,  
313 SUMO1 increases the inward  $\text{Na}^+$  current, and on the other hand, it decreases the outward  
314 potassium current at the sub-threshold range of voltages. Together, the SUMOylation of  
315 these channels modulates the gain of neuronal responses to depolarizing current injection  
316 by affecting the steepness of the post-spike voltage trajectory towards the next spike  
317 threshold. In contrast, deSUMOylation of  $\text{Na}^+$  and  $\text{K}^+$  channels by SENP1 decreased  
318 neuronal gain indicating that native neuronal channels are partially SUMOylated under  
319 baseline conditions. These findings are congruent with reports describing SUMO-  
320 regulation of  $\text{Na}^+$  and  $\text{K}^+$  channels in neurons (Plant et al., 2011; Plant et al., 2012; Qi et  
321 al., 2014; Plant et al., 2016; Welch et al., 2019).

322 We observe that the effects of SUMO1 differs in different parts of the neuron due  
323 to the heterogeneous subcellular distribution of sodium channel subtypes and their  
324 differential susceptibility to SUMOylation. In pyramidal neurons, the SUMO1 sensitive  
325 sodium channels,  $\text{Na}_v1.2$ , are in the area associated with backpropagation, i.e. in the soma,  
326 dendrites, and proximal parts of the AIS (Lorincz and Nusser, 2008; Hu et al., 2009;

327 Grubb et al., 2011; Plant et al., 2016). The SUMO1 insensitive  $\text{Na}_v1.6$  channels,  
328 however, are located mostly in the distal part of the AIS and in the nodes of Ranvier, i.e.  
329 in the compartments associated with spike forward propagation (Caldwell et al., 2000;  
330 Lorincz and Nusser, 2008; Hu et al., 2009; Li et al., 2014; Tian et al., 2014; Plant et al.,  
331 2016). In the physiological context, this means that SUMO influences the processes  
332 mediated by  $\text{Na}_v1.2$  but not  $\text{Na}_v1.6$ , which are spatially distributed along the neuron. The  
333 differential effect of SUMO1 on propagation speed (**Figure 6**), in addition to the  
334 differential effect of SUMO1 on the activation curve of the  $I_{\text{NaP}}$  (**Figure 3**) supports this  
335 hypothesis.

336 In cortical pyramidal neurons, spike forward propagation is mediated by  $\text{Na}_v1.6$ ,  
337 and backpropagation is mediated by  $\text{Na}_v1.2$ , due to the subcellular compartmentalization  
338 of these channel subtypes (Hu et al., 2009). Our evidence that SUMO1 affects the  
339 backpropagation, but not forward propagation indicates that activation of SUMOylation  
340 pathways does not affect the ongoing processing by the cortical neuronal circuits.  
341 However, SUMO1, in its physiological context, may play an important role in the  
342 regulation of spike-time-dependent plasticity of dendritic spines. The backpropagating  
343 APs invading the dendrites remove  $\text{Mg}^{2+}$  from NMDA receptor channels and trigger the  
344 long-lasting changes in synaptic strength (Markram et al., 1997; Sjöström et al., 2001;  
345 Holtmaat and Svoboda, 2009). The activation of  $5\text{-HT}_{1A}$  receptors decreases the success  
346 rate of AP backpropagation and enhances the segregation of axonal and dendritic  
347 activities (Yin et al., 2017).

348 Unlike phosphorylation, SUMOylation of the target proteins is reported to depend  
349 on SUMO concentration (for review see (Flotho and Melchior, 2013)). SUMO acts as a

350 limiting factor for conjugation because of the abundance of enzymes responsible for  
351 SUMO attachment in the cytosol. Similarly, the concentration of SUMO-specific  
352 proteases that cleave the isopeptide bonds is a limiting factor for deSUMOylation. Thus,  
353 intracellular administration of the exogenous SUMO1 and SENP1 is capable of either  
354 saturating or emptying the SUMO-conjugation sites on the ion channels, respectively,  
355 reflecting the local concentrations of the peptides. However, because of the complex  
356 morphological structure of L5 pyramidal neurons, diffusion of SUMO1 and SENP1 from  
357 the somatic whole-cell pipette into the cytosol is expected to be extremely slow, with half  
358 diffusion times of several hours (Fleidervish et al., 2008). Therefore, a limitation of this  
359 study is that the concentration of these peptides is expected to be significantly lower  
360 throughout the neurons than the pipette concentration making it difficult to predict  
361 whether SUMOylation of the Na<sup>+</sup> and K<sup>+</sup> channels has reached steady state even after our  
362 30 min protocols.

363         Our results demonstrate that SUMOylation of Na<sub>v</sub>1.2 channels significantly  
364 increases the speed of AP backpropagation. The subsequent events and consequences  
365 due to the acceleration may need to be further investigated, for example, the change of  
366 the Ca<sup>2+</sup> transient to synaptic contacts on dendrites, the alteration of local dendritic  
367 membrane excitability, and the potential effects on other neuromodulator receptors.  
368 SUMOylation might alter the time delay between the pre- and post-synaptic action  
369 potentials thereby influencing the resulting change in synaptic efficiency. Together with  
370 the synergistic effect on the excitability in cortical pyramidal neurons, our findings  
371 suggest that Na<sub>v</sub>1.2 and the SUMO pathway might be a new mechanism for the  
372 regulation of action potential and neuronal function in brain.



373

## 374 **Acknowledgments**

375 This research was supported by The Israel Science Foundation (grant No. 1384/19) and  
376 National Institutes of Health grant R01HL10549 (to S.A.N.G.)

377

## 378 **Author contributions**

379 O.K. and Y.K. performed experiments. H.D., L.D.P., and S.A.N.G. created the transgenic  
380 mouse; O.K., Y.K., A.S. and I.A.F. analyzed data; S.A.N.G. and I.A.F. designed the  
381 research. O.K., Y.K., H.D., L.D.P., S.A.N.G., and I.A.F. wrote the paper.

382

## 383 **Declaration of interests**

384 The authors report no competing financial interests.

385

## 386 **Star methods**

### 387 **KEY RESOURCES TABLE**

| REAGENT or RESOURCE                           | SOURCE      | IDENTIFIER |
|-----------------------------------------------|-------------|------------|
| Chemicals, Peptides, and Recombinant Proteins |             |            |
| Human SUMO1                                   | RND Systems | UL-740     |

|                                             |                 |            |
|---------------------------------------------|-----------------|------------|
| Human SENP1                                 | RND Systems     | E-700      |
| Experimental Models: Organisms/Strains      |                 |            |
| Mouse: C57BL/6N-Scn2a-K38Q <sup>Mut/+</sup> | Biocytogen      | EGE-ZY-016 |
| Software and Algorithms                     |                 |            |
| NEURON 8.1                                  | Yale university | SCR_005393 |

388

### 389 **LEAD CONTACT AND MATERIALS AVAILABILITY**

390 Further Information and requests for resources and reagents should be directed to the  
391 Lead Contacts. Materials generated through this work are available from the Lead  
392 Contact upon reasonable request.

393

### 394 **EXPERIMENTAL MODEL**

#### 395 *Animals*

396 The C57BL/6N-Nav1.2-K38Q<sup>Mut/+</sup> mice were generated by and obtained from Biocytogen  
397 (Wakefield, Massachusetts). The Nav1.2-K38Q<sup>Mut/+</sup> mice backcrossed against C57BL/6N  
398 for 5 generations. Both male and female mice were used without bias. This study was  
399 carried out at the Ben-Gurion University of the Negev in accordance with the  
400 recommendations of guidelines for the welfare of experimental animals. Animal  
401 experiments were approved by the Institutional Animal Care and Use Committee of Ben-  
402 Gurion University.

403

## 404 **METHOD DETAILS**

### 405 *Generation of the Scn2a-K38Q knock in mice model*

406 The Scn2a-K38Q mutation knock in mice were generated using a CRISPR/Cas9 based  
407 approach. Briefly, two sgRNAs were designed using the CRISPR design tool  
408 (<http://www.sanger.ac.uk/>) to target the region of the exon 1 of the Scn2a gene locus,  
409 then screened for on-target activity using a Universal CRISPR Activity Assay (UCATM,  
410 Biocytogen Pharmaceuticals Co., Ltd). The T7 promoter sequence was added to the Cas9  
411 or sgRNA template by PCR amplification *in vitro*. Different concentrations of the donor  
412 vector and the purified, *in vitro*-transcribed Cas9 mRNA and sgRNA were mixed and co-  
413 injected into the cytoplasm of one-cell stage fertilized egg from a C57BL/6N mouse. The  
414 injected zygotes were transferred into the oviducts of Kunming pseudopregnant females  
415 to generate F0 mice. PCR and sequencing verified founder pups harboring the intended  
416 mutation were then crossed with wild-type mice for germline transmission. The germline  
417 sequence was confirmed by PCR, sequencing and Southern blot analysis.

### 418 *Slice preparation and whole-cell recording*

419 Experiments were performed on L5 pyramidal neurons in 300  $\mu\text{m}$  thick mouse cortical  
420 sagittal slices using previously described techniques (Fleidervish et al., 2010; Katz et al.,  
421 2018). The P18-P24 mice of either sex (Envigo, Israel) were anesthetized with Isoflurane,  
422 decapitated, and the brains were placed in cold (4-8°C) oxygenated (95% O<sub>2</sub>-5% CO<sub>2</sub>)  
423 artificial cerebrospinal fluid (aCSF). The composition of the aCSF was (in mM): 124  
424 NaCl, 3 KCl, 2 CaCl<sub>2</sub>, 2 MgSO<sub>4</sub>, 1.25 NaH<sub>2</sub>PO<sub>4</sub>, 26 NaHCO<sub>3</sub>, and 10 glucose (all

425 chemicals obtained from Sigma Aldrich); pH was 7.4 when bubbled with 95% O<sub>2</sub>/CO<sub>2</sub>.  
426 Slices were cut on a vibratome (VT1200, Leica) and placed in a holding chamber  
427 containing oxygenated aCSF at room temperature; they were transferred to a recording  
428 chamber after at least 30 mins of incubation.

429 The cells were viewed with a 40 or 60 × water-immersion lens in a BX51WI microscope  
430 (Olympus) mounted on an X–Y translation stage (Luigs and Neumann, Germany).  
431 Somatic whole-cell recordings were made using patch pipettes pulled from thick-walled  
432 borosilicate glass capillaries (1.5-mm outer diameter; Science Products, Germany). The  
433 pipette solution for whole-cell voltage-clamp experiments contained (in mM): 135 CsCl,  
434 2 MgCl<sub>2</sub>, 4 NaCl, 10 HEPES, pH adjusted to 7.3 with CsOH (all chemicals obtained from  
435 Sigma Aldrich) and it was supplemented with 2 mM of Na<sup>+</sup>-sensitive dye, SBFI tetra-  
436 ammonium salt (ThermoFisher Scientific) (Minta and Tsien, 1989). When filled with  
437 this solution, pipettes had resistance of 3–6 MΩ. Voltage-clamp recordings from L5  
438 neurons visually identified using IR-DIC optics (Stuart et al., 1993) were made with a  
439 MultiClamp 700B amplifier equipped with CV-7B headstage (Molecular Devices). Data  
440 were low-pass-filtered at 2 kHz (–3 dB, 4-pole Bessel filter) and digitized at 10 kHz  
441 using Digidata 1322A digitizer driven by PClamp 9 software (Molecular Devices). Care  
442 was taken to maintain the access resistance as low as possible (usually 6–7 MΩ and  
443 always less than 10 MΩ); series resistance was 80% compensated using the built-in  
444 circuitry of the amplifier. Ca<sup>2+</sup> currents were blocked by adding 200 μM Cd<sup>2+</sup> to the bath.  
445 Voltages were not corrected for liquid junction potential. The recordings were made at  
446 room temperature (20 ± 1 °C). Current-clamp recordings were made with a MultiClamp  
447 700B amplifier (Molecular Devices). Data were low-pass-filtered at 30 kHz (–3 dB,

448 four-pole Bessel filter) and digitized at 100 kHz. Somatic recordings were made by using  
449 patch pipettes pulled from thick-walled borosilicate glass capillaries (1.5 mm outer  
450 diameter; Hilgenberg). Pipettes had resistances of 5-7 M $\Omega$  when filled with K gluconate  
451 based solution with the following composition (in mM): 130 K-gluconate, 6 KCl, 2  
452 MgCl<sub>2</sub>, 4 NaCl, and 10 HEPES, with pH adjusted to 7.25 with KOH. Solution was  
453 supplemented with 2 mM of sodium-binding benzofuran isophthalate (SBFI, Molecular  
454 Probes).

455 EPSP were elicited by delivering brief (0.1 ms) current pulses using optically  
456 coupled ISO-Flex Stimulus Isolator (AMPI, Jerusalem) via the bipolar Tungsten  
457 electrode (WPI, 0.01 M $\Omega$ ) placed in the vicinity of the postsynaptic neuron. The  
458 stimulation intensity was carefully controlled to elicit monosynaptic, subthreshold EPSPs  
459 with a latency of <1 ms post-stimulus.

460 SUMO (1 nM) and SENP (0.25 nM) were delivered to the neurons intracellularly  
461 via the whole cell recording pipette.

#### 462 *Measuring propagation speed*

463 To measure action potential propagation velocity, we performed simultaneous  
464 recordings from soma and axon of L5 pyramidal neurons. The whole-cell current clamp  
465 somatic recordings were obtained, and the neurons were filled for 15 min with Na<sup>+</sup>  
466 indicator, SBFI (2 mM), as described above. Trains of five action potentials were elicited  
467 by delivering brief current steps via the somatic pipette, and axons were identified by  
468 their characteristic Na<sup>+</sup> signals. Another pipette filled with the extracellular solution  
469 supplemented with SBFI (2 mM), with a resistance of 15–20 M $\Omega$ , was positioned at

470 different points along the axon in a loose-patch configuration. At each point along the  
471 axon, 100 single APs were elicited by delivering brief current pulses via the somatic  
472 electrode, and axonal action currents were simultaneously recorded. Both pipettes were  
473 coated to within  $\sim 100$   $\mu\text{m}$  of the tip with Parafilm (Sigma-Aldrich) to minimize stray  
474 capacitance. Currents were low-pass-filtered at 100 kHz ( $-3$  dB, four-pole Bessel filter)  
475 and digitized at 200 kHz. To identify the time delays between the somatic and the axonal  
476 signals, they were aligned to the times of maximal rate-of-rise of the somatic APs and  
477 averaged. Then, the differences between the times of peak of the axonal action currents  
478 and times of maximal rate-of-rise of the somatic APs were calculated.

#### 479 *Sodium imaging*

480 Imaging experiments were performed as described previously (Baranauskas et al.,  
481 2013; Shvartsman et al., 2021). SBF1 fluorescence was excited by using a high-intensity  
482 LED device [ $385 \pm 4$  nm; Prizmatix], and the emission was collected by using a modified  
483 Olympus U-MNU2 filter set (400-nm dichroic mirror; 420-nm long pass emission filter).  
484 The fluorescent response of SBF1 was recorded using a back-illuminated  $80 \times 80$  pixel  
485 cooled camera (NeuroCCDSMQ; RedShirt Imaging) at 500 frames/second acquisition  
486 speed controlled by Neuroplex software. Indicator bleaching was corrected by subtracting  
487 an equivalent blank trace without electrical stimulation.

#### 488 *Data analysis*

489 Data analysis was accomplished using pCLAMP10 software (Molecular Devices) and  
490 Origin 6.0 (OriginLab). If not otherwise noted, values are given as mean  $\pm$  S.E. Student's  
491 *t* test was used for statistical analysis.

## 492 *Modeling*

493 Numerical simulations were performed in the NEURON simulation environment  
494 (Hines and Carnevale, 1997). Unless otherwise stated, electrophysiological parameters  
495 and dynamic  $[Na^+]_i$  changes were studied in a simplified compartmental model that  
496 encompassed the fundamental morphological and electrical features of layer 5 pyramidal  
497 neurons as described previously (Baranauskas et al., 2013; Shvartsman et al., 2021).

498 In the model, the 1.2  $\mu m$ -thick AIS extended over the first 40 - 50  $\mu m$  of the axon.  
499 The subsequent segment (length, 50  $\mu m$ ; diameter, 1.2  $\mu m$ ) was myelinated. The nodes  
500 were 1  $\mu m$  long and had a diameter of 1.2  $\mu m$ , and the myelinated internodes were 2  $\mu m$   
501 long and had a diameter of 1.2  $\mu m$ . In addition to the axon, the soma (length 35  $\mu m$ ,  
502 diameter: 23  $\mu m$ ) gave rise to the apical dendrite (length 350  $\mu m$ , diameter 3.5  $\mu m$ ) and  
503 two basal dendrites (length 200  $\mu m$ , diameter 1.2  $\mu m$ ). For spatial precision, all  
504 compartments were divided into 1  $\mu m$  long isopotential segments.

505 The passive electrical properties  $R_m$ ,  $C_m$ , and  $R_i$  were set to 25,000  $\Omega cm^2$ , 1  $\mu F$   
506  $cm^{-2}$ , and 150  $\Omega cm$ , respectively, uniformly. The myelinated internode had  $C_m$  of 0.5  
507  $\mu F \cdot cm^{-2}$ . The resting membrane potential at the soma was set to  $-75 mV$ .

508 All simulations were run with 1- $\mu s$  time steps, and the nominal temperature was  
509 set to 18  $^{\circ}C$ . The model used a Hodgkin-Huxley-based  $Na^+$  conductance. The steady  
510 state activation and inactivation characteristics of the  $Na_v1.6$  channels were left-shifted  
511 by 6 mV and 3 mV, respectively, compared with the  $Na_v1.2$  channels. The  $Na^+$   
512 conductance was set to 200 pS  $\mu m^{-2}$  in the soma, 200 pS  $\mu m^{-2}$  in the apical dendrite, 40  
513 pS  $\mu m^{-2}$  in the basal dendrites, 1,200 pS  $\mu m^{-2}$  in the nodes of Ranvier; no  $Na^+$  channels

514 were present in the internodes. The model included Kv and Kv1 K<sup>+</sup> channels with  
515 kinetics and density as previously described. The K<sup>+</sup> equilibrium potential was set to -85  
516 mV.

517 The AIS contained variable Na<sup>+</sup> channel density as described by Baranauskas et al.  
518 (Baranauskas et al., 2013). At both proximal and medial parts of the AIS the gNa was  
519 represented only by Na<sub>v</sub>1.2 channels. The gNa at the proximal AIS segment incremented  
520 linearly from 200 pS μm<sup>-2</sup> to 800 pS μm<sup>-2</sup>, the middle AIS part had a constant gNa of 800  
521 pS μm<sup>-2</sup>. The distal AIS part was populated by Na<sub>v</sub>1.6 channels with density  
522 decrementing from 800 to 0 pS μm<sup>-2</sup>.

523 Diffusion of Na<sup>+</sup> ions was modeled as the exchange of Na<sup>+</sup> ions between adjacent  
524 neuronal compartments using the intrinsic protocols in NEURON, assuming a diffusion  
525 coefficient of 0.6 μm<sup>2</sup> ms<sup>-1</sup> (Kushmerick and Podolsky, 1969; Fleidervish et al., 2010).  
526 The resting intracellular and the extracellular Na<sup>+</sup> concentrations were set to 4 and 151  
527 mmol/L, respectively.

528



529

530 **Figures and Legends**

531

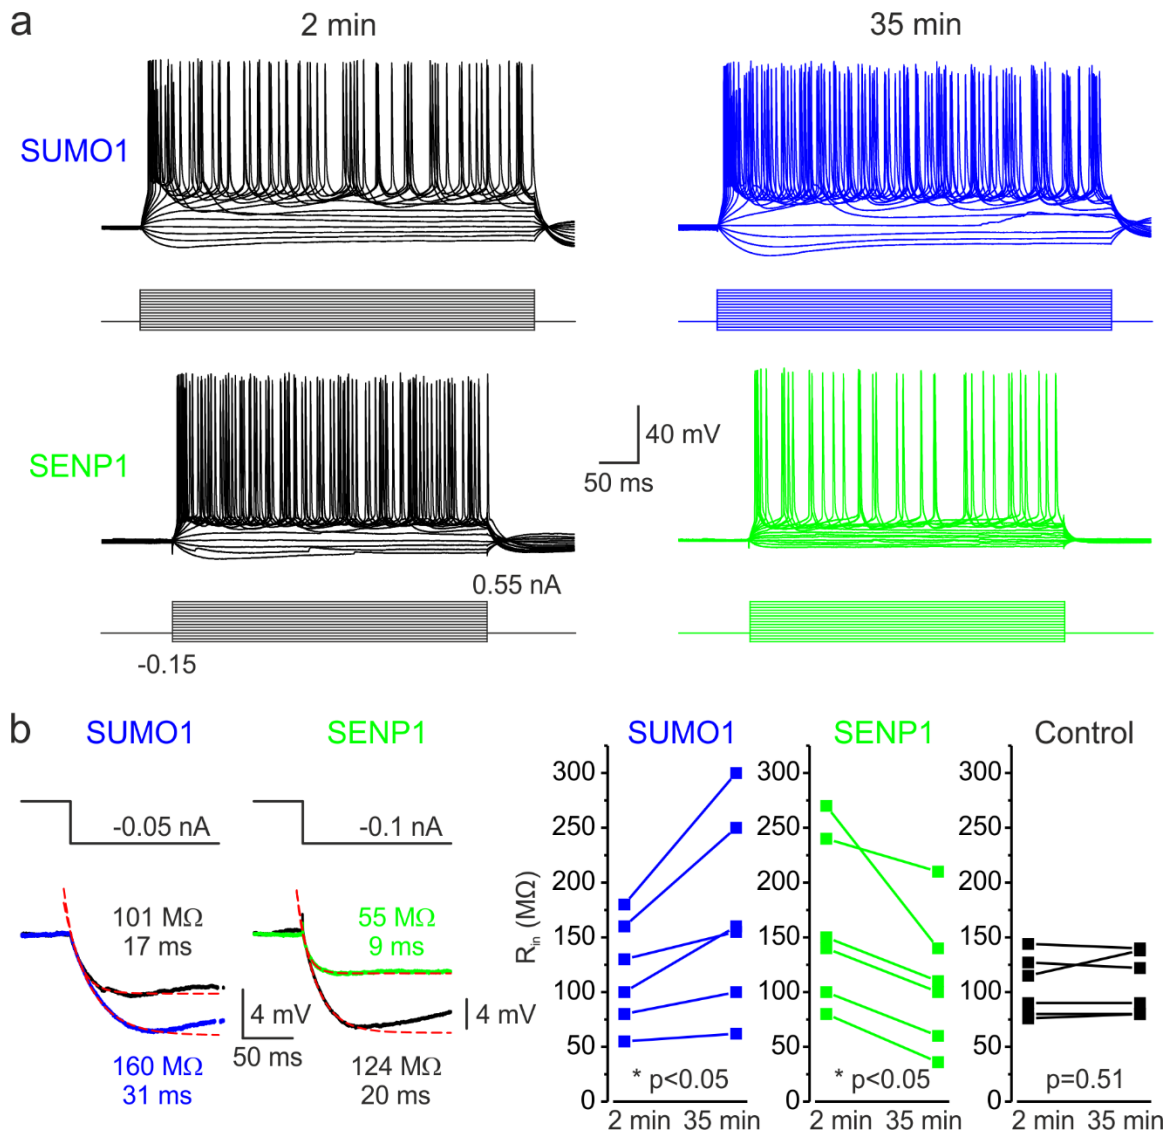

532

533 **Figure 1. SUMOylation and deSUMOylation have opposing effects on the**  
 534 **excitability of Layer 5 pyramidal neurons.**

535 **(a)** Current clamp, whole-cell recordings from L5 neurons 2 mins after the break-in to  
 536 whole-cell mode (black) and 35 mins later demonstrate time-dependent effects of

537 SUMO1 (blue) or SENP1 (green) dialysis on firing frequency. Voltage responses were  
538 elicited by injecting 400 ms long current pulses which started at -0.15 nA and  
539 incremented by 50 pA.

540 **(b)** SUMO1 and SENP1 have opposite effects on passive membrane properties. *Left*,  
541 voltage responses to a small hyperpolarizing current pulse injection immediately after the  
542 break-in (black) and following SUMO1 (blue) or SENP1 (green) dialysis via the whole-  
543 cell pipette. Red dashed lines are the best exponential fits of the voltage responses.  
544 Notice that the amplitude of voltage deflection and the membrane time constant were  
545 enhanced by SUMO1 and decreased by SENP1 dialysis. *Right*, apparent input resistance  
546 ( $R_{in}$ ) increased in SUMO1 dialyzed neurons, whereas it decreased in SENP1 dialyzed  
547 cells. The lines connect the paired  $R_{in}$  values obtained from the same individual neuron  
548 at 2 min and 35 min of recording with SUMO1 (blue), SENP1 (green), and control  
549 solution filled pipette (black).

550

551 **Figure 1 - Figure Supplement 1.** The effects of SUMO1 and SENP1 on input/output  
552 gain.

553

554

555

556

557

558

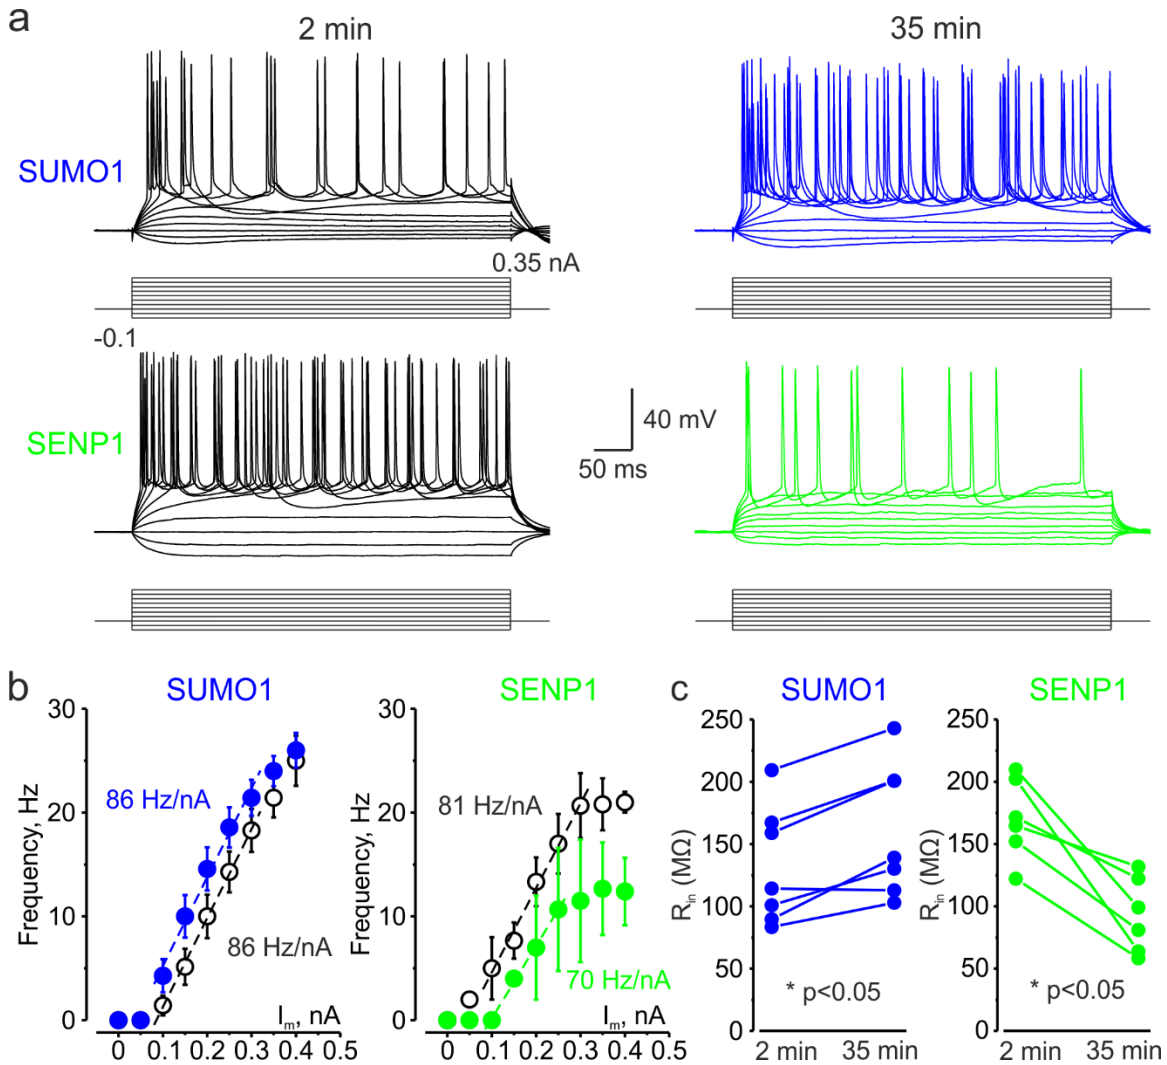

559

560

561 **Figure 2.** In L5 Na<sub>v</sub>1.2-Lys38Gln mutant neurons, SUMO1 and SENP1 do not affect  
 562 the gain of the input-output curve.

563 **(a)** Current clamp, whole-cell recordings from L5 Na<sub>v</sub>1.2-Lys38Gln mutant neurons  
 564 immediately after the break-in (black) and following SUMO1 (blue) or SENP1 (green)  
 565 dialysis. Voltage responses were elicited by injecting 400 ms long current pulses which  
 566 started at -0.15 nA and incremented by 50 pA.

567 **(b)** The F-I characteristic of Na<sub>v</sub>1.2-Lys38Gln mutant neurons obtained immediately  
568 after the break-in (black) and following SUMO1 (n=6, blue) or SENP1 (n=8, green)  
569 dialysis via the whole-cell pipette. Notice the opposite effects of SUMO1 and SENP1 on  
570 the position of the F-I curve over the current axis. Both treatments had little to no effect  
571 on the slope of the F-I curve.

572 **(c)** The R<sub>in</sub> increased over time in SUMO1 dialyzed Na<sub>v</sub>1.2-Lys38Gln mutant neurons,  
573 whereas it decreased in SENP1 dialyzed cells. Dots represent the values for the R<sub>in</sub>  
574 measured in individual SUMO1 (blue), SENP1 (green) immediately after the break-in  
575 and following SUMO1 or SENP1 dialysis.

576

577

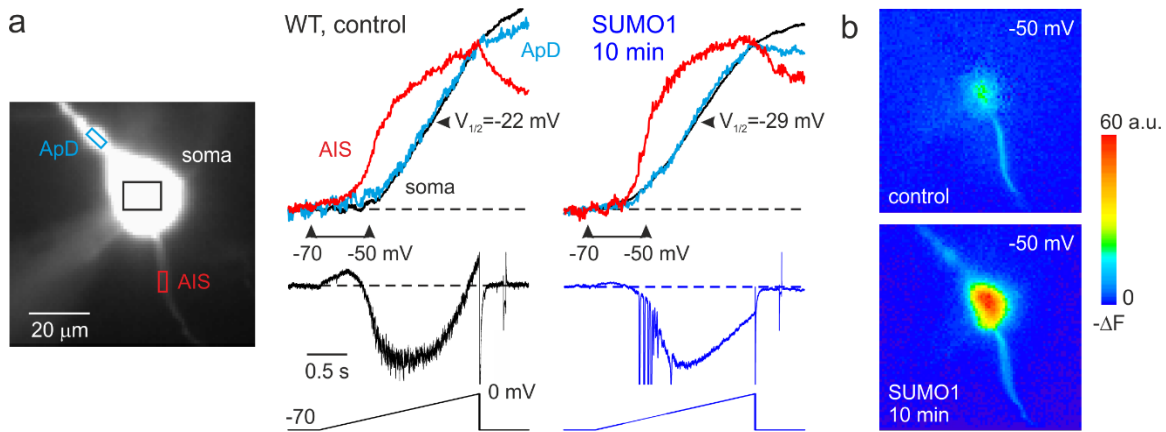

578

579 **Figure 3.** SUMO1 causes a leftward shift of activation kinetics of  $I_{NaP}$  in pyramidal cells  
580 from wild type but not from  $Na_v1.2$ -Lys38Gln mutant mice.

581 **(a)** *Left*, WT L5 pyramidal neuron filled with SBFI-containing,  $Cs^+$ -based solution via a  
582 somatic patch pipette, as seen during the fluorescence imaging experiment with a  
583 NeuroCCD-SMQ camera. *Right*,  $I_{NaP}$  and normalized somatic (black), axonal (red), and  
584 dendritic (cyan)  $\Delta F$  transients elicited by 2 s long voltage ramp from -70 mV to 0 mV  
585 immediately after the break-in and following 10 minutes of dialysis with SUMO1.  
586 Notice the leftward shift in  $I_{NaP}$  activation in soma, dendrite, and to a lesser extent, in AIS.

587 **(b)** Pseudocolor maps of the ramp elicited  $\Delta F$  changes between the times marked by the  
588 arrowheads in A. *Top*, voltage ramp from -70 to -50 mV elicited  $Na^+$  elevation mostly in  
589 the AIS. *Bottom*, following the SUMO1 dialysis, voltage ramp from -70 to -50 mV  
590 elicited large  $Na^+$  signals also in the soma and dendrites.

591 **Figure 3 - Figure Supplement 1.**  $V_{1/2}$  of  $I_{NaP}$  activation in the soma (black) and AIS (red)  
592 of WT pyramidal neurons immediately after the break-in and following 10 minutes of  
593 dialysis with SUMO1.

594 **Figure 3 - Figure Supplement 2.**  $V_{1/2}$  of  $I_{NaP}$  activation in the soma (black) and AIS (red)  
595 of pyramidal neurons of animals carrying  $Na_v1.2$ -Lys38Gln mutation, immediately after  
596 the break-in, and following 10 minutes of dialysis with SUMO1.

597

598

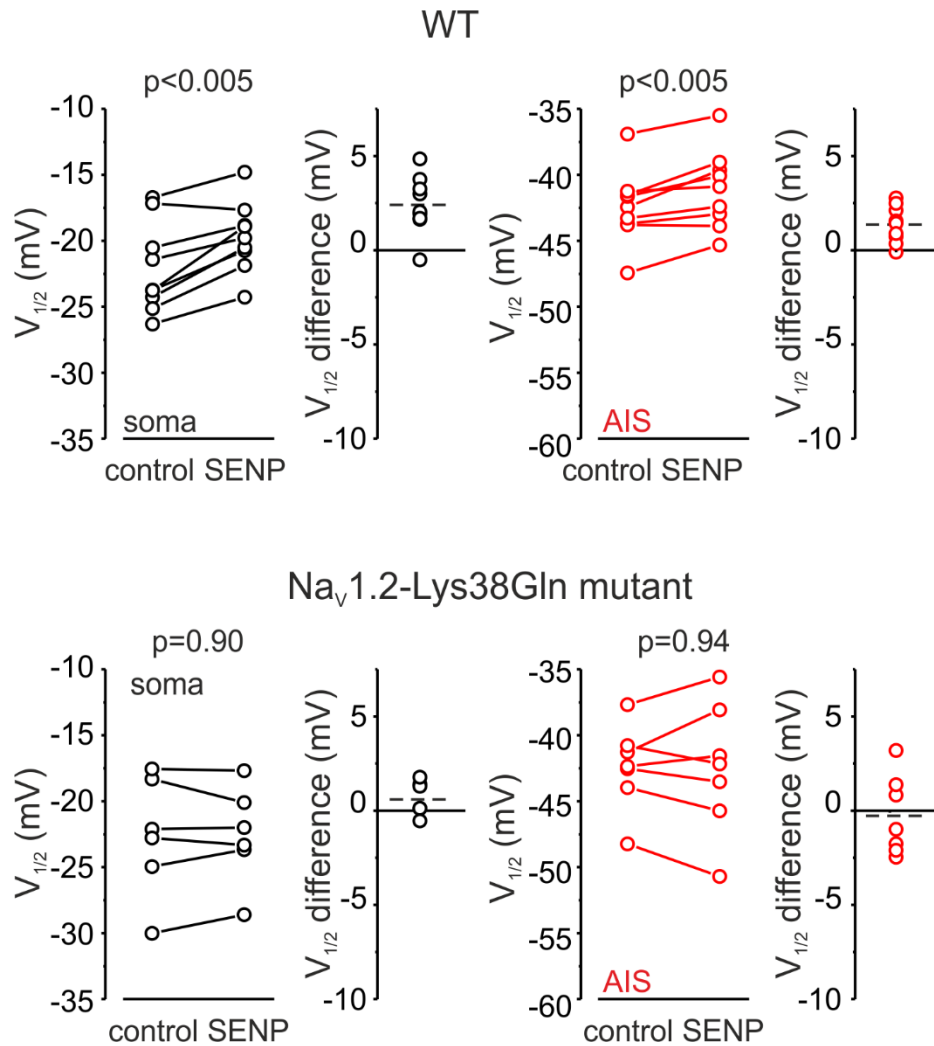

599

600

601 **Figure 4.** SENP1 causes a rightward shift of activation kinetics of  $I_{NaP}$  in pyramidal cells

602 from wild type but not from Na<sub>v</sub>1.2-Lys38Gln mutant mice.

603  $V_{1/2}$  of  $I_{NaP}$  activation in the soma (black) and AIS (red) of WT (top) and Nav1.2-

604 Lys38Gln mutant (bottom) pyramidal neurons immediately after the break-in and

605 following 10 minutes of dialysis with SENP1. Dots represent the results of  $V_{1/2}$

606 measurements in individual cells.

607

608

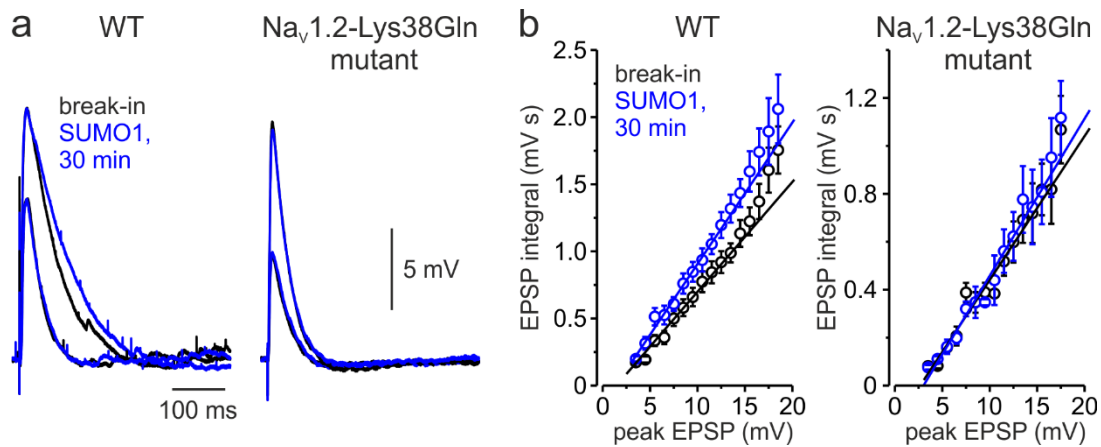

609

610

611 **Figure 5.** Effect of SUMO1 on voltage-dependent amplification of EPSPs in pyramidal  
612 neurons from wild type and  $Na_v1.2$ -Lys38Gln mutant mice.

613 **(a)** Comparison of small and large EPSPs evoked in WT and  $Na_v1.2$ -Lys38Gln mutant  
614 pyramidal neurons immediately after the brake-in (black) and following the SUMO1  
615 dialysis (blue). Notice the slower decay time constant of larger EPSP following SUMO1  
616 dialysis in WT neuron.

617 **(b)** The mean EPSP integral as a function of peak EPSP amplitude after the brake-in  
618 (black) and following the SUMO1 dialysis (blue) of the WT (n=6) and  $Na_v1.2$ -Lys38Gln  
619 mutant (n=6) pyramidal neurons. Notice amplification of smaller EPSPs in SUMO1  
620 dialyzed WT cells.

621

622

623



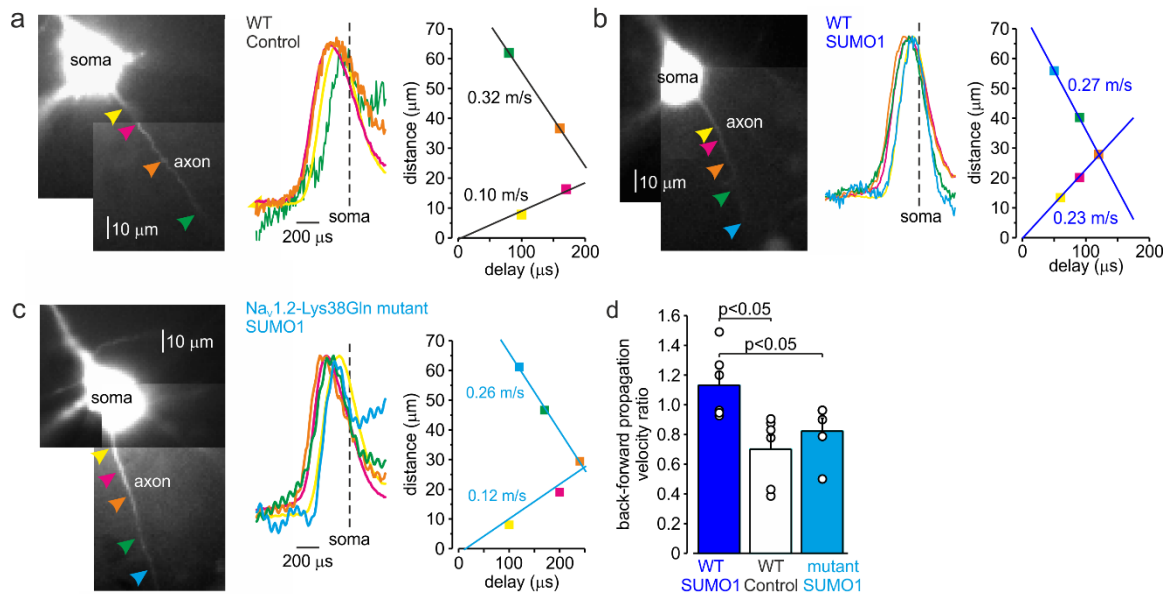

624  
625 **Figure 6.** SUMOylation differentially affects the velocity of forward- and back-  
626 propagating action potentials.

627 **(a)** *Left*, normalized averaged action currents ( $n = 500$ ) elicited by a single AP at the  
628 axonal regions indicated by arrows, to demonstrate the difference in the delay of their  
629 onset. The dashed vertical line corresponds to the time of  $dB/dt_{\max}$  of the somatic action  
630 potential. *Right*, distance from the edge of the soma as a function of delay of spike  
631 initiation plotted. Note that AP initiates in a region located between the pink and brown  
632 arrows and propagates with an apparent conduction velocity of  $\sim 0.32$  and  $\sim 0.10$  m/s  
633 forward and backward, respectively.

634 **(b)** In SUMO1 dialyzed neurons, there was little difference in apparent conduction  
635 velocity of forward- and back-propagating action potential ( $\sim 0.27$  vs  $0.23$  m/s,  
636 respectively).

637 (c) In a representative neuron from Na<sub>v</sub>1.2-Lys38Gln mutant animal, SUMO1 dialysis  
638 does not change the velocity of backpropagating action potential (~0.26 vs 0.12 m/s for  
639 forward and backpropagation, respectively).

640 (d) SUMOylation causes a significant increase in the back/forward propagation velocity  
641 ratio. Each dot represents the velocity measurement in individual control (n=6, black),  
642 SUMO1 dialyzed WT (n=6, blue) and SUMO1 dialyzed Na<sub>v</sub>1.2-Lys38Gln mutant (n=4,  
643 blue) axon.

644

645 **Figure 6 - Figure Supplement 1.** In computational models, SUMOylation of Na<sub>v</sub>1.2  
646 channels selectively accelerates spike backpropagation.

647 (e) In computational models, SUMOylation of Na<sub>v</sub>1.2 channels selectively accelerates  
648 spike backpropagation. *Left*, Schematic drawing of L5 pyramidal neuron with Na<sub>v</sub>1.2  
649 (red) present in the soma and proximal AIS and Na<sub>v</sub>1.6 (green) localized in the distal AIS  
650 and nodes of Ranvier. *Right*, the delays of AP initiation plotted against distance from the  
651 edge of the soma in the model of a neuron under control conditions (black) and following  
652 the SUMO1 dialysis. Straight lines are linear fits of the linear portions of the delay-  
653 distance relationship with their slopes representing the velocities of back- and forward-  
654 propagation velocities. Note that SUMOylation of Na<sub>v</sub>1.2 channels selectively enhances  
655 the velocity of backpropagating AP.

656

## 657 **References**

- 658 Astman N, Gutnick MJ, Fleidervish IA (2006) Persistent sodium current in layer 5  
659 neocortical neurons is primarily generated in the proximal axon. *J Neurosci*  
660 26:3465-3473.
- 661 Baranauskas G, David Y, Fleidervish IA (2013) Spatial mismatch between the Na<sup>+</sup> flux  
662 and spike initiation in axon initial segment. *Proc Natl Acad Sci U S A* 110:4051-  
663 4056.
- 664 Bean BP (2007) The action potential in mammalian central neurons. *Nat Rev Neurosci*  
665 8:451-465.
- 666 Bender KJ, Uebele VN, Renger JJ, Trussell LO (2012) Control of firing patterns through  
667 modulation of axon initial segment T-type calcium channels. *J Physiol* 590:109-  
668 118.
- 669 Caldwell JH, Schaller KL, Lasher RS, Peles E, Levinson SR (2000) Sodium channel  
670 Na(v)1.6 is localized at nodes of ranvier, dendrites, and synapses. *Proc Natl Acad*  
671 *Sci U S A* 97:5616-5620.
- 672 Cantrell AR, Catterall WA (2001) Neuromodulation of Na<sup>+</sup> channels: an unexpected  
673 form of cellular plasticity. *Nat Rev Neurosci* 2:397-407.
- 674 Cantrell AR, Ma JY, Scheuer T, Catterall WA (1996) Muscarinic modulation of sodium  
675 current by activation of protein kinase C in rat hippocampal neurons. *Neuron*  
676 16:1019-1026.
- 677 Chance FS, Abbott LF, Reyes AD (2002) Gain modulation from background synaptic  
678 input. *Neuron* 35:773-782.
- 679 Chen Y, Yu FH, Sharp EM, Beacham D, Scheuer T, Catterall WA (2008) Functional  
680 properties and differential neuromodulation of Na(v)1.6 channels. *Mol Cell*  
681 *Neurosci* 38:607-615.
- 682 Deisz RA, Fortin G, Zieglgänsberger W (1991) Voltage dependence of excitatory  
683 postsynaptic potentials of rat neocortical neurons. *J Neurophysiol* 65:371-382.
- 684 Fleidervish IA, Libman L, Katz E, Gutnick MJ (2008) Endogenous polyamines regulate  
685 cortical neuronal excitability by blocking voltage-gated Na<sup>+</sup> channels. *Proc Natl*  
686 *Acad Sci U S A* 105:18994-18999.
- 687 Fleidervish IA, Lasser-Ross N, Gutnick MJ, Ross WN (2010) Na<sup>+</sup> imaging reveals little  
688 difference in action potential-evoked Na<sup>+</sup> influx between axon and soma. *Nat*  
689 *Neurosci* 13:852-860.
- 690 Flotho A, Melchior F (2013) Sumoylation: a regulatory protein modification in health  
691 and disease. *Annu Rev Biochem* 82:357-385.
- 692 Goldin AL, Barchi RL, Caldwell JH, Hofmann F, Howe JR, Hunter JC, Kallen RG,  
693 Mandel G, Meisler MH, Netter YB, Noda M, Tamkun MM, Waxman SG, Wood  
694 JN, Catterall WA (2000) Nomenclature of voltage-gated sodium channels.  
695 *Neuron* 28:365-368.
- 696 Grubb MS, Shu Y, Kuba H, Rasband MN, Wimmer VC, Bender KJ (2011) Short- and  
697 long-term plasticity at the axon initial segment. *J Neurosci* 31:16049-16055.

- 698 Hines ML, Carnevale NT (1997) The NEURON simulation environment. *Neural Comput*  
699 9:1179-1209.
- 700 Holtmaat A, Svoboda K (2009) Experience-dependent structural synaptic plasticity in the  
701 mammalian brain. *Nat Rev Neurosci* 10:647-658.
- 702 Hu W, Tian C, Li T, Yang M, Hou H, Shu Y (2009) Distinct contributions of Na(v)1.6  
703 and Na(v)1.2 in action potential initiation and backpropagation. *Nat Neurosci*  
704 12:996-1002.
- 705 Katz E, Stoler O, Scheller A, Khrapunsky Y, Goebbels S, Kirchhoff F, Gutnick MJ, Wolf  
706 F, Fleidervish IA (2018) Role of sodium channel subtype in action potential  
707 generation by neocortical pyramidal neurons. *Proc Natl Acad Sci U S A*  
708 115:E7184-E7192.
- 709 Kole MH, Stuart GJ (2012) Signal processing in the axon initial segment. *Neuron*  
710 73:235-247.
- 711 Kushmerick MJ, Podolsky RJ (1969) Ionic mobility in muscle cells. *Science* 166:1297-  
712 1298.
- 713 Lezmy J, Lipinsky M, Khrapunsky Y, Patrich E, Shalom L, Peretz A, Fleidervish IA,  
714 Atali B (2017) M-current inhibition rapidly induces a unique CK2-dependent  
715 plasticity of the axon initial segment. *Proc Natl Acad Sci U S A* 114:E10234-  
716 E10243.
- 717 Li T, Tian C, Scalmani P, Frassoni C, Mantegazza M, Wang Y, Yang M, Wu S, Shu Y  
718 (2014) Action potential initiation in neocortical inhibitory interneurons. *PLoS*  
719 *Biol* 12:e1001944.
- 720 Lorincz A, Nusser Z (2008) Cell-type-dependent molecular composition of the axon  
721 initial segment. *J Neurosci* 28:14329-14340.
- 722 Lorincz A, Nusser Z (2010) Molecular identity of dendritic voltage-gated sodium  
723 channels. *Science* 328:906-909.
- 724 Markram H, Lubke J, Frotscher M, Sakmann B (1997) Regulation of synaptic efficacy by  
725 coincidence of postsynaptic APs and EPSPs. *Science* 275:213-215.
- 726 Maurice N, Tkatch T, Meisler M, Sprunger LK, Surmeier DJ (2001) D1/D5 dopamine  
727 receptor activation differentially modulates rapidly inactivating and persistent  
728 sodium currents in prefrontal cortex pyramidal neurons. *J Neurosci* 21:2268-2277.
- 729 Minta A, Tsien RY (1989) Fluorescent indicators for cytosolic sodium. *J Biol Chem*  
730 264:19449-19457.
- 731 Plant LD, Marks JD, Goldstein SA (2016) SUMOylation of NaV1.2 channels mediates  
732 the early response to acute hypoxia in central neurons. *Elife* 5.
- 733 Plant LD, Dowdell EJ, Dementieva IS, Marks JD, Goldstein SA (2011) SUMO  
734 modification of cell surface Kv2.1 potassium channels regulates the activity of rat  
735 hippocampal neurons. *J Gen Physiol* 137:441-454.
- 736 Plant LD, Zuniga L, Araki D, Marks JD, Goldstein SA (2012) SUMOylation silences  
737 heterodimeric TASK potassium channels containing K2P1 subunits in cerebellar  
738 granule neurons. *Sci Signal* 5:ra84.

- 739 Plant LD, Xiong D, Romero J, Dai H, Goldstein SAN (2020) Hypoxia Produces Pro-  
740 arrhythmic Late Sodium Current in Cardiac Myocytes by SUMOylation of  
741 Na(V)1.5 Channels. *Cell Rep* 30:2225-2236.e2224.
- 742 Plant LD, Dementieva IS, Kollewe A, Olikara S, Marks JD, Goldstein SA (2010) One  
743 SUMO is sufficient to silence the dimeric potassium channel K2P1. *Proc Natl*  
744 *Acad Sci U S A* 107:10743-10748.
- 745 Qi Y, Wang J, Bomben VC, Li DP, Chen SR, Sun H, Xi Y, Reed JG, Cheng J, Pan HL,  
746 Noebels JL, Yeh ET (2014) Hyper-SUMOylation of the Kv7 potassium channel  
747 diminishes the M-current leading to seizures and sudden death. *Neuron* 83:1159-  
748 1171.
- 749 Rajan S, Plant LD, Rabin ML, Butler MH, Goldstein SA (2005) Sumoylation silences the  
750 plasma membrane leak K<sup>+</sup> channel K2P1. *Cell* 121:37-47.
- 751 Rasband MN (2010) The axon initial segment and the maintenance of neuronal polarity.  
752 *Nat Rev Neurosci* 11:552-562.
- 753 Rush AM, Dib-Hajj SD, Waxman SG (2005) Electrophysiological properties of two  
754 axonal sodium channels, Nav1.2 and Nav1.6, expressed in mouse spinal sensory  
755 neurones. *J Physiol* 564:803-815.
- 756 Shvartsman A, Kotler O, Stoler O, Khrapunsky Y, Melamed I, Fleidervish IA (2021)  
757 Subcellular distribution of persistent sodium conductance in cortical pyramidal  
758 neurons. *J Neurosci* 41:6190-6201.
- 759 Sjöström PJ, Turrigiano GG, Nelson SB (2001) Rate, timing, and cooperativity jointly  
760 determine cortical synaptic plasticity. *Neuron* 32:1149-1164.
- 761 Smith MR, Smith RD, Plummer NW, Meisler MH, Goldin AL (1998) Functional analysis  
762 of the mouse Scn8a sodium channel. *J Neurosci* 18:6093-6102.
- 763 Stuart G (1999) Voltage-activated sodium channels amplify inhibition in neocortical  
764 pyramidal neurons. *Nat Neurosci* 2:144-150.
- 765 Stuart G, Sakmann B (1995) Amplification of EPSPs by axosomatic sodium channels in  
766 neocortical pyramidal neurons. *Neuron* 15:1065-1076.
- 767 Stuart G, Spruston N, Sakmann B, Hausser M (1997) Action potential initiation and  
768 backpropagation in neurons of the mammalian CNS. *Trends Neurosci* 20:125-131.
- 769 Stuart GJ, Sakmann B (1994) Active propagation of somatic action potentials into  
770 neocortical pyramidal cell dendrites. *Nature* 367:69-72.
- 771 Stuart GJ, Dodt HU, Sakmann B (1993) Patch-clamp recordings from the soma and  
772 dendrites of neurons in brain slices using infrared video microscopy. *Pflugers*  
773 *Arch* 423:511-518.
- 774 Tian C, Wang K, Ke W, Guo H, Shu Y (2014) Molecular identity of axonal sodium  
775 channels in human cortical pyramidal cells. *Front Cell Neurosci* 8:297.
- 776 Welch MA, Forster LA, Atlas SI, Baro DJ (2019) SUMOylating Two Distinct Sites on  
777 the A-type Potassium Channel, Kv4.2, Increases Surface Expression and  
778 Decreases Current Amplitude. *Frontiers in molecular neuroscience* 12:144.
- 779 Xiong D, Li T, Dai H, Arena AF, Plant LD, Goldstein SAN (2017) SUMOylation  
780 determines the voltage required to activate cardiac I(Ks) channels. *Proc Natl Acad*  
781 *Sci U S A* 114:E6686-e6694.

782 Yin L, Rasch MJ, He Q, Wu S, Dou F, Shu Y (2017) Selective Modulation of Axonal  
783 Sodium Channel Subtypes by 5-HT1A Receptor in Cortical Pyramidal Neuron.  
784 Cereb Cortex 27:509-521.

785 Zhou W, Goldin AL (2004) Use-dependent potentiation of the Nav1.6 sodium channel.  
786 Biophys J 87:3862-3872.

787

788

789 **Figure Supplements**

790

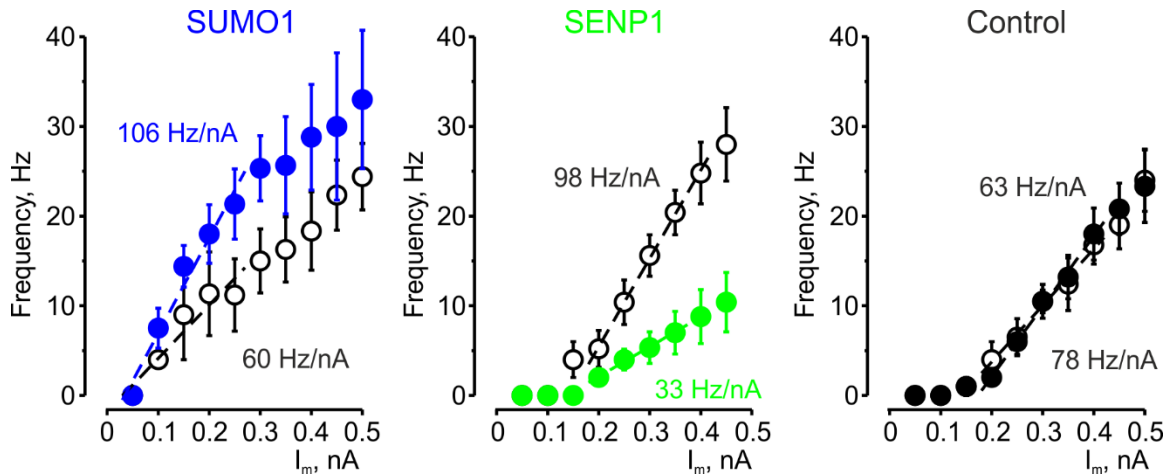

791

792 **Figure 1 - Figure Supplement 1.** The effects of SUMO1 and SENP1 on input/output  
793 gain.

794

795 The frequency–current (F-I) characteristic of L5 pyramidal neurons, constructed by  
796 plotting the mean instantaneous spike frequency as a function of depolarizing current  
797 pulse amplitude obtained immediately after the break-in (black) and following SUMO1  
798 (n=6, blue) or SENP1 (n=8, green) dialysis via the whole-cell pipette. Notice that the F-I  
799 curve was shifted to the left and became steeper in SUMO1 dialyzed neurons, whereas in  
800 SENP1 dialyzed cells the F-I characteristics was displaced to the right and its slope  
801 decreased compared with control. The F-I curve showed no significant change in control  
802 recordings (n=6).

803

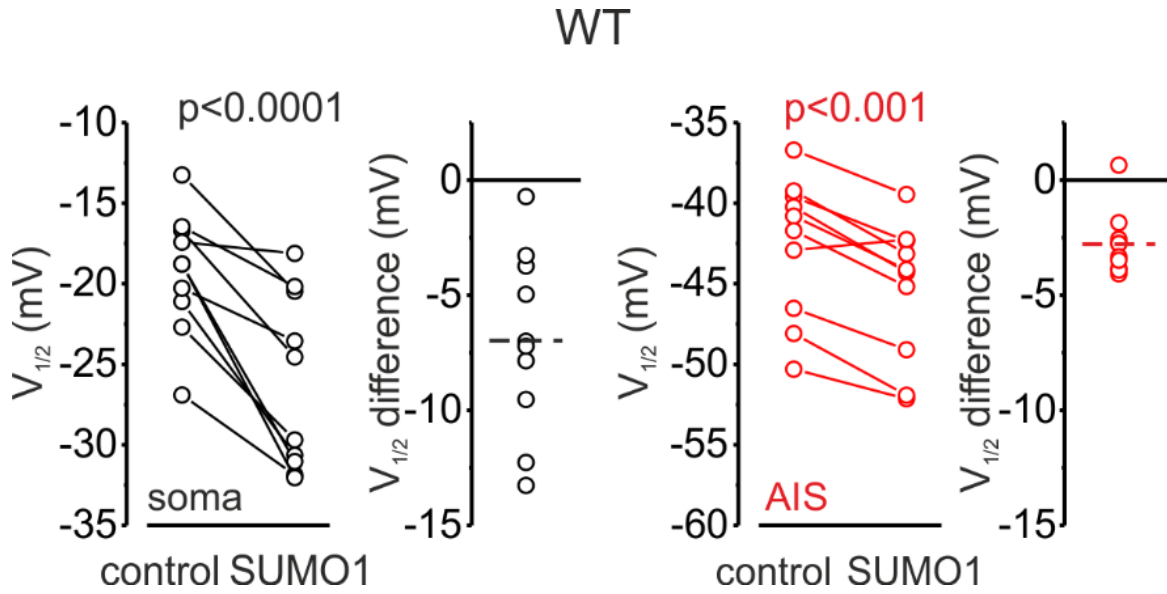

804

805

806 **Figure 3 - Figure Supplement 1.**  $V_{1/2}$  of  $I_{NaP}$  activation in the soma (black) and AIS (red)  
807 of WT pyramidal neurons immediately after the break-in and following 10 minutes of  
808 dialysis with SUMO1. Dots represent the results of  $V_{1/2}$  measurements in individual cells.

809



## Na<sub>v</sub>1.2-Lys38Gln mutant

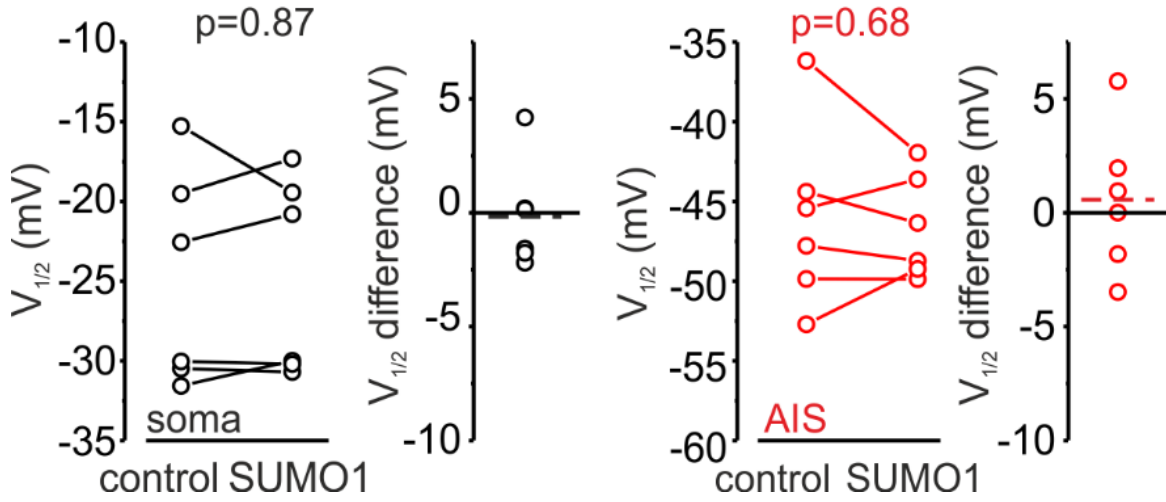

810

811

812 **Figure 3 - Figure Supplement 2.**  $V_{1/2}$  of  $I_{NaP}$  activation in the soma (black) and AIS (red)  
813 of pyramidal neurons of animals carrying Na<sub>v</sub>1.2-Lys38Gln mutation, immediately after  
814 the break-in, and following 10 minutes of dialysis with SUMO1. Dots represent the  
815 results of  $V_{1/2}$  measurements in individual cells.

816

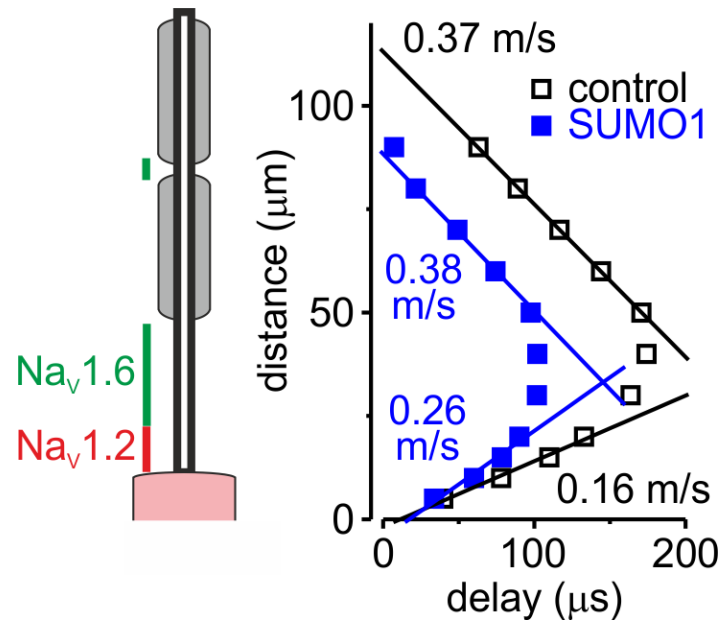

817

818

819 **Figure 6 - Figure Supplement 1.** In computational models, SUMOylation of Na<sub>v</sub>1.2  
820 channels selectively accelerates spike backpropagation.

821 *Left*, Schematic drawing of L5 pyramidal neuron with Na<sub>v</sub>1.2 (red) present in the soma  
822 and proximal AIS and Na<sub>v</sub>1.6 (green) localized in the distal AIS and nodes of Ranvier.

823 *Right*, the delays of AP initiation plotted against distance from the edge of the soma in  
824 the model of a neuron under control conditions (black) and following the SUMO1  
825 dialysis. Straight lines are linear fits of the linear portions of the delay-distance  
826 relationship with their slopes representing the velocities of back- and forward-  
827 propagation velocities. Note that SUMOylation of Na<sub>v</sub>1.2 channels selectively enhances  
828 the velocity of backpropagating AP.

829

830

831 **Supplementary Figures**

832

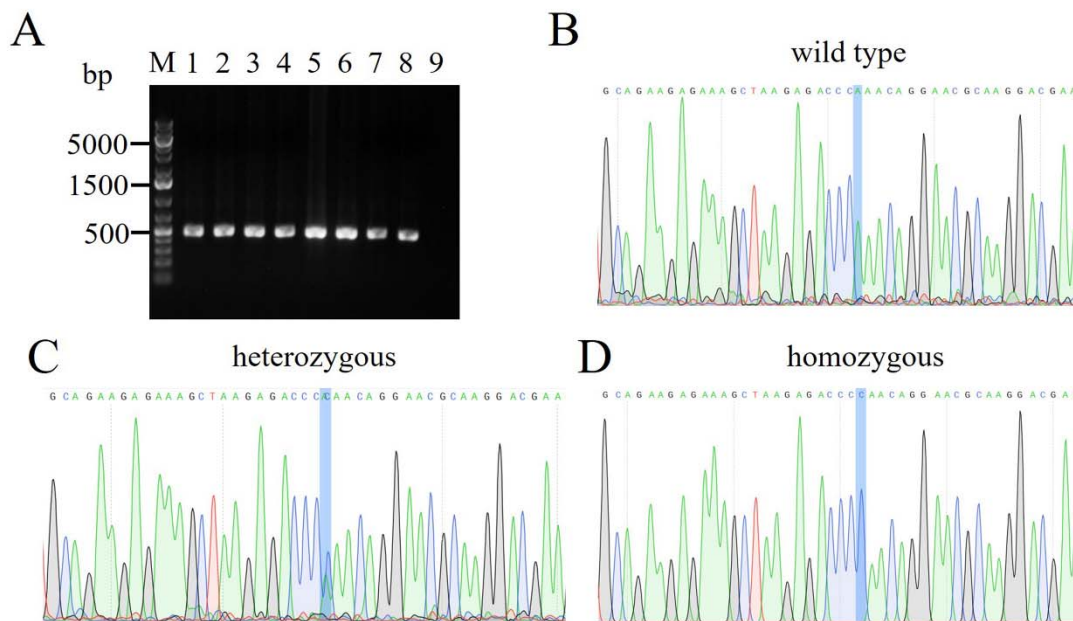

833

834 **Figure S1.** Genotyping of transgenic mice obtained through CRISPR-Cas9 targeting of  
835 the *Scn2a* gene.

836 (A) PCR screening. Results of 8 pups are shown (lanes 1-8). The CRISP-targeted *Scn2a*  
837 locus was amplified from genomic DNA isolated from mouse tails using two gene-  
838 specific primers (*Scn2a*-F: 5'-CCGCCAGGACCTGACAGCTTC-3'; *Scn2a*-R: 5'-  
839 CATGCCCCCTTGCAGGATGCC-3'). The PCR products were separated by gel  
840 electrophoresis on a 2% agarose gel. The expected amplicon size is 457 bp for all wild  
841 type, heterozygous and homozygous samples. No band was observed in the non-template  
842 control (lane 9).

843 (B) Representative sequencing of PCR amplicon of the wild-type sample. Lys38,  
844 encoded by the AAA codon, was shown in the wild-type allele.

845 (C) Representative sequencing of PCR amplicon of the heterozygous sample. Double  
846 peaks of A and C nucleotides evidenced the integration of the Lys38Gln mutation in the  
847 genome (Codon AAA = Lysine → CAA = Glutamine).

848 (D) Representative sequencing of PCR amplicon of the homozygous sample. Glutamine,  
849 encoded by the CAA codon, confirmed the replacement of Lys38 in the genome.

850

851
